# Supplementary material for: SARS-CoV-2 Reverse Zoonoses to Pumas and Lions, South Africa
Source: MDPI journal article supplement (doi:10.3390/v14010120), 2022-01-11
Supplement: s1 [file s1]

Suppl Table S1: PCR and serological results from direct and indirect human contacts with infected lions.

|                  | <b>PCR</b>                                        |                              | <b>Serology</b>          |                              |                          |                                                                     |                                      |
|------------------|---------------------------------------------------|------------------------------|--------------------------|------------------------------|--------------------------|---------------------------------------------------------------------|--------------------------------------|
| <b>ID</b>        | <b><u>Result</u></b><br><b><u>(Ct value)</u></b>  | <b><u>Date of result</u></b> | <b><u>Result</u></b>     | <b><u>Date of Result</u></b> | <b><u>Job at Zoo</u></b> | <b><u>Nature of Contact with Animals</u></b>                        | <b><u>Previous COVID-19 test</u></b> |
| ZRUCWL001        | Negative                                          | 25/06/2021                   | Negative                 | 25/06/2021                   | Keeper                   | <b>Direct:</b> Enter enclosure, contact with food and waste         | None                                 |
| ZRUCWL002        | Negative                                          | 25/06/2021                   | Negative                 | 25/06/2021                   | Kitchen staff            | <b>Indirect:</b> Handle food/utensils                               | None                                 |
| ZRUCWL003        | Negative                                          | 25/06/2021                   | Negative                 | 25/06/2021                   | Cats Keeper              | <b>Direct:</b> Enter enclosure, contact with food and waste         | None                                 |
| ZRUCWL004        | Negative                                          | 25/06/2021                   | Negative                 | 25/06/2021                   | Owner                    | <b>Direct:</b> Touching                                             | None                                 |
| <b>ZRUCWL005</b> | <b>Positive</b><br><b>(27,26;</b><br><b>33,3)</b> | 25/06/2021<br>12/07/2021     | <b>Positive</b>          | 25/06/2021<br>12/07/2021     | Head big cat keeper      | <b>Direct:</b> Enter enclosure, contact with food and waste         | None                                 |
| <b>ZRUCWL006</b> | Negative                                          | 25/06/2021                   | <b>Positive</b>          | 25/06/2021                   | Manager                  | <b>Direct:</b> Enter enclosure, contact with food and waste/Darting | Yes<br>(positive)<br>04/01/2021      |
| ZRUCWL007        | Negative                                          | 25/06/2021                   | Negative                 | 25/06/2021                   | Kitchen staff            | <b>Indirect:</b> Handle food/utensils                               | None                                 |
| ZRUCWL008        | Negative                                          | 25/06/2021                   | Negative                 | 25/06/2021                   | Assistant manager        | <b>Direct:</b> Enter enclosure, contact with food and waste/Darting | None                                 |
| <b>ZRUCWL009</b> | Negative                                          | 25/06/2021                   | <b>Positive</b>          | 25/06/2021                   | Big cat keeper           | <b>Direct:</b> Enter enclosure, contact with food and waste         | None                                 |
| <b>ZRUCWL010</b> | Negative                                          | 25/06/2021                   | <b>Positive</b>          | 25/06/2021                   | Cubs keeper              | <b>Direct:</b> Enter enclosure, contact with food and waste/Darting | None                                 |
| ZRUCWL011        | Negative                                          | 25/06/2021                   | Positive<br>(Vaccinated) | 25/06/2021                   | Veterinarian             | <b>Direct:</b> Direct contact during medicals/darting               | None                                 |
| <b>ZRUCWL012</b> | <b>Positive</b><br><b>(ND;</b><br><b>23,28)</b>   | 26/06/2021<br>12/07/2021     | <b>Positive</b>          | 25/06/2021                   | Maintenance              | <b>Indirect:</b> Maintenance                                        | None                                 |

Suppl Table S2. Detection of SARS-CoV-2 E and RdRp genes from lion faecal samples in Ct values.

|                  | Target | 25-Jun-21 | 07-Jul-21 | 10-Jul-21 | 12-Jul-21 |
|------------------|--------|-----------|-----------|-----------|-----------|
| <b>ZRU125/21</b> | E      | No sample | 33,5      | Neg       | Neg       |
|                  | RdRp   | No sample | Neg       | Neg       | Neg       |
| <b>ZRU127/21</b> | E      | 37,53     | Neg       | Neg       | Neg       |
|                  | RdRp   | Neg       | Neg       | Neg       | Neg       |
| <b>ZRU128/21</b> | E      | 32,73     | Neg       | Neg       | Neg       |
|                  | RdRp   | 34,7      | Neg       | Neg       | Neg       |

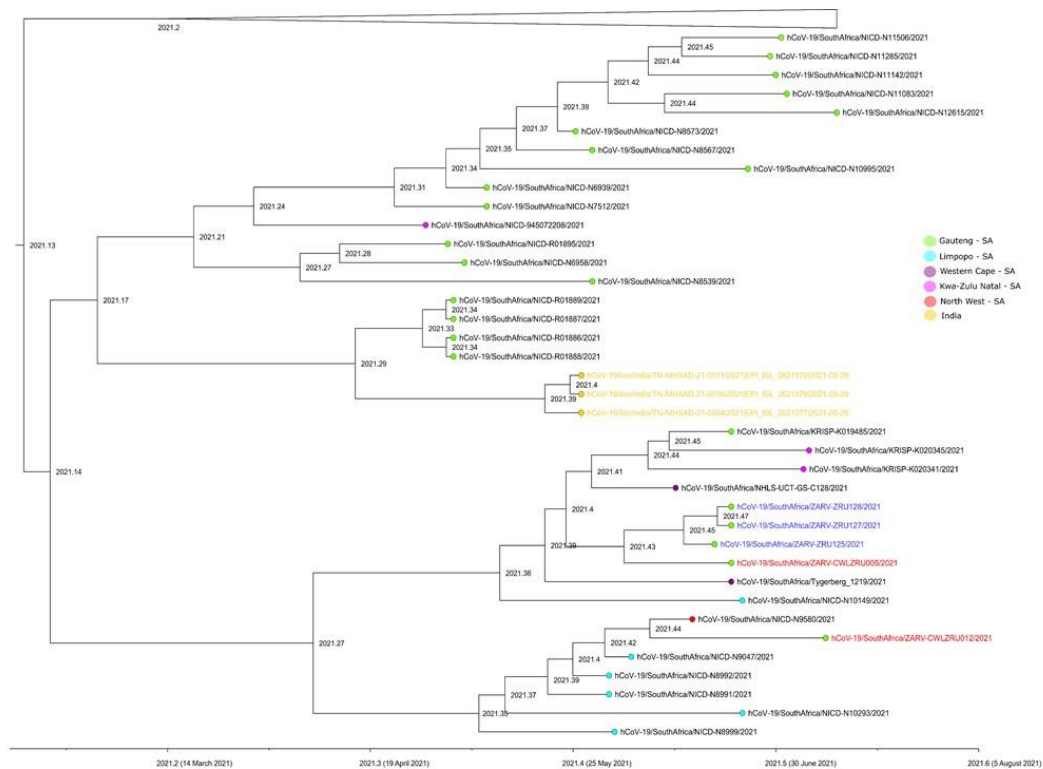

**Suppl Figure S1.** Bayesian phylogenetic inference of whole genome sequences detected in lions and humans. Node tips are coloured by area where samples were taken. Lion samples detected in India is coloured in yellow. Study samples are coloured in blue (lions) and red (humans); ZRU125/21 (EPI-ISL-6261983), ZRU127/21 (EPI-ISL-6261987), ZRU128/21 (EPI-ISL-6261989), ZRUCWL005 (EPI-ISL-6261993) and ZRUCWL012 (EPI-ISL-6261996).
